# Supplementary material for: Improved Nutritional Knowledge in the Obese Adult Population Modifies Eating Habits and Serum and Anthropometric Markers
Source: Nutrients. 2020 Oct 30;12(11):3355. doi: 10.3390/nu12113355 (PMC7693073; doi:10.3390/nu12113355)
Supplement: Supplementary file 1 [file nutrients-12-03355-s001.zip]

Archive with 10 entries (8 files):
- nutrients-975371-supplementary/
- nutrients-975371-supplementary/Supp File 2. NUTRIENTS_975371_R1.pdf
- nutrients-975371-supplementary/Supplementary file 1.pdf
- nutrients-975371-supplementary/__MACOSX/
- nutrients-975371-supplementary/__MACOSX/._Supp File 2. NUTRIENTS_975371_R1.pdf
- nutrients-975371-supplementary/__MACOSX/._Supplementary file 1.pdf
- Supp File 2. NUTRIENTS_975371_R1.pdf
- Supplementary file 1.pdf
- __MACOSX/._Supp File 2. NUTRIENTS_975371_R1.pdf
- __MACOSX/._Supplementary file 1.pdf
